# Supplementary material for: Evaluation of Polyphenolic Profile and Antioxidant Activity of Sea Buckthorn (Elaeagnus rhamnoides (L.) A. Nelson) Leaf and Berry Extracts Obtained via Optimized Microwave-Assisted and Accelerated Solvent Extraction
Source: MDPI journal article supplement (doi:10.3390/pr12010126), 2024-01-03
Supplement: s1 [file s1]

Table S1. UPLC/ESI-MS<sup>2</sup> characterization of polyphenolic compounds in sea buckthorn leaves and berries extracts obtained by convectional extraction (CE)

| Phenolic compounds |                                                      | Precursor Ion<br>(m/z) | Fragment Ions<br>(m/z) | Ionization Mode | Mass Concentration<br>(mg/100 g dm) |            |
|--------------------|------------------------------------------------------|------------------------|------------------------|-----------------|-------------------------------------|------------|
|                    |                                                      |                        |                        |                 | Leaves                              | Berries    |
| FLAVONOLS          |                                                      |                        |                        |                 |                                     |            |
| 1                  | Isorhamnetin                                         | 317                    | 201                    | positive        | 3.2±0.0                             | 0.7±0.0    |
| 2                  | Isorhamnetin-3-sinapoyglucose-glucoside-7-rhamnoside | 993                    | 463, <b>317</b>        | positive        | 1.8±0.0                             | 2.2±0.0    |
| 3                  | Ishorhamnetin-3-sophoroside-7-rhamnoside             | 787                    | 463, <b>317</b>        | positive        | 7.8±1.0                             | 1.3±0.0    |
| 4                  | Isorhamnetin-3-rutinoside-7-glucoside                | 787                    | 479, <b>317</b>        | positive        | 3.7±0.0                             | 2.4±0.0    |
| 5                  | Isorhamnetin-3-hexoside                              | 479                    | 317                    | positive        | 49.0±3.6                            | 17.7±2.6   |
| 6                  | Isorhamnetin-3-rhamnoside                            | 463                    | 317                    | positive        | 10.8±1.4                            | 40.6±4.1   |
| 7                  | Isorhamnetin-3,7-dihexoside                          | 641                    | 479, <b>317</b>        | positive        | 15.9±2.1                            | 41.1±5.13  |
| 8                  | Isorhamnetin-3-rutinoside                            | 625                    | 479, <b>317</b>        | positive        | 17.8±1.9                            | 19.7±0.6   |
| 9                  | Kaempferol                                           | 287                    | 145                    | positive        | 18.0±2.6                            | 30.9±1.5   |
| 10                 | Kaempferol-3-O-sophorose-7-O-rhamnoside              | 757                    | 287                    | positive        | 5.8±0.5                             | 15.3±0.9   |
| 11                 | Kaempferol-3-O-glucoside-7-O-rhamnoside              | 595                    | 433, <b>287</b>        | positive        | nd                                  | 11.4±1.4   |
| 12                 | Kaempferol-3-rutinoside*                             | 595                    | 287                    | positive        | 1.0±0.1                             | 303.1±14.5 |
| 13                 | Kaempferol-rhamnoside                                | 433                    | 287                    | positive        | 0.5±0.0                             | 61.3±8.6   |
| 14                 | Quercetin-3-sophoroside-7-rhamnoside                 | 773                    | 611, <b>303</b>        | positive        | 2.4±0.1                             | 7.3±0.3    |
| 15                 | Quercetin-3-rhamnosylglucoside-7-rhamnoside          | 757                    | 303                    | positive        | 2.4±0.2                             | 5.7±1.4    |
| 16                 | Quercetin-3-rutinoside (rutin)                       | 611                    | 303                    | positive        | 14.3±1.0                            | 19.9±1.9   |
| 17                 | Quercetin-3-glucoside*                               | 465                    | 303                    | positive        | 6.5±1.5                             | 4.0±0.0    |
| 18                 | Quercetin-3-rhamnoside (quercitrin)                  | 449                    | 303                    | positive        | 4.5±0.8                             | 21.6±4.3   |
| 19                 | Quercetin-3-pentoside                                | 435                    | 303                    | positive        | 1.2±0.0                             | 7.2±0.2    |
| FLAVAN-3-OLS       |                                                      |                        |                        |                 |                                     |            |
| 20                 | Catechin*                                            | 291                    | 139                    | positive        | 1.9±0.0                             | 5.1±0.4    |
| 21                 | Epicatechin*                                         | 291                    | 165                    | positive        | 1.0±0.0                             | 10.7±2.4   |
| PHENOLIC ACIDS     |                                                      |                        |                        |                 |                                     |            |

|    |                       |     |     |          |          |           |
|----|-----------------------|-----|-----|----------|----------|-----------|
| 22 | Caffeic acid*         | 179 | 135 | negative | 26.2±2.4 | 8.6±0.6   |
| 23 | Chlorogenic acid*     | 353 | 191 | negative | 1.1±0.0  | 0.6±0.0   |
| 24 | Ellagic acid          | 301 | 257 | negative | 1.7±0.0  | 22.5±4.2  |
| 25 | Gallic acid*          | 169 | 125 | negative | 0.2±0.0  | 91.8±10.4 |
| 26 | p-hydroxybenzoic acid | 137 | 93  | negative | 39.4±5.4 | 29.2±4.7  |
| 27 | p-coumaric acid*      | 163 | 119 | negative | 4.2±0.0  | 18.5±2.5  |
| 28 | Protocatechuic acid   | 153 | 109 | negative | 31.0±4.1 | 3.94±0.0  |
| 29 | Vanillic acid*        | 169 | 125 | positive | 24.9±2.6 | 22.4±4.5  |

---

\* identification confirmed using authentic standards; nd-not detected. dm-dry mass. Bold fragment ions - major fragment ions
